# Supplementary material
Source: publisher figshare collection journal article supplement (https://acs.figshare.com/ndownloader/files/4570009)
Supplement: Supplementary file 1 [file 4570009]

 
data_n 
 
_audit_creation_method            SHELXL-97 
_chemical_name_systematic 
; 
 ? 
; 
_chemical_name_common             ? 
_chemical_melting_point           ? 
_chemical_formula_moiety          ? 
_chemical_formula_sum 
 'C42.50 H44 B Cl O1.50 P' 
_chemical_formula_weight          656.01 
 
loop_ 
 _atom_type_symbol 
 _atom_type_description 
 _atom_type_scat_dispersion_real 
 _atom_type_scat_dispersion_imag 
 _atom_type_scat_source 
 'C'  'C'   0.0033   0.0016 
 'International Tables Vol C Tables 4.2.6.8 and 6.1.1.4' 
 'H'  'H'   0.0000   0.0000 
 'International Tables Vol C Tables 4.2.6.8 and 6.1.1.4' 
 'P'  'P'   0.1023   0.0942 
 'International Tables Vol C Tables 4.2.6.8 and 6.1.1.4' 
 'O'  'O'   0.0106   0.0060 
 'International Tables Vol C Tables 4.2.6.8 and 6.1.1.4' 
 'Cl'  'Cl'   0.1484   0.1585 
 'International Tables Vol C Tables 4.2.6.8 and 6.1.1.4' 
 'B'  'B'   0.0013   0.0007 
 'International Tables Vol C Tables 4.2.6.8 and 6.1.1.4' 
 
_symmetry_cell_setting            monoclinic 
_symmetry_space_group_name_H-M    C2/c
 
loop_ 
 _symmetry_equiv_pos_as_xyz 
 'x, y, z' 
 '-x, y, -z+1/2' 
 'x+1/2, y+1/2, z' 
 '-x+1/2, y+1/2, -z+1/2' 
 '-x, -y, -z' 
 'x, -y, z-1/2' 
 '-x+1/2, -y+1/2, -z' 
 'x+1/2, -y+1/2, z-1/2' 
 
_cell_length_a                    22.702(4) 
_cell_length_b                    14.908(4) 
_cell_length_c                    22.802(5) 
_cell_angle_alpha                 90.00 
_cell_angle_beta                  112.368(4) 
_cell_angle_gamma                 90.00 
_cell_volume                      7137(3) 
_cell_formula_units_Z             8 
_cell_measurement_temperature     110(2) 
_cell_measurement_reflns_used     ? 
_cell_measurement_theta_min       ? 
_cell_measurement_theta_max       ? 
 
_exptl_crystal_description        block
_exptl_crystal_colour             colorless
_exptl_crystal_size_max           0.35 
_exptl_crystal_size_mid           0.12 
_exptl_crystal_size_min           0.06 
_exptl_crystal_density_meas       ? 
_exptl_crystal_density_diffrn     1.221 
_exptl_crystal_density_method     'not measured' 
_exptl_crystal_F_000              2784 
_exptl_absorpt_coefficient_mu     0.186 
_exptl_absorpt_correction_type    none
_exptl_absorpt_correction_T_min   0.9377 
_exptl_absorpt_correction_T_max   0.9889 
_exptl_absorpt_process_details    none 
 
_exptl_special_details 
; 
 ? 
; 
 
_diffrn_ambient_temperature       110(2) 
_diffrn_radiation_wavelength      0.71073 
_diffrn_radiation_type            MoK\a 
_diffrn_radiation_source          'fine-focus sealed tube' 
_diffrn_radiation_monochromator   graphite 
_diffrn_measurement_device_type   'CCD area detector' 
_diffrn_measurement_method        'phi and omega scans'
_diffrn_detector_area_resol_mean  ? 
_diffrn_standards_number          ? 
_diffrn_standards_interval_count  ? 
_diffrn_standards_interval_time   ? 
_diffrn_standards_decay_%         ? 
_diffrn_reflns_number             30837 
_diffrn_reflns_av_R_equivalents   0.0680 
_diffrn_reflns_av_sigmaI/netI     0.0490 
_diffrn_reflns_limit_h_min        -25 
_diffrn_reflns_limit_h_max        25 
_diffrn_reflns_limit_k_min        -17 
_diffrn_reflns_limit_k_max        17 
_diffrn_reflns_limit_l_min        -26 
_diffrn_reflns_limit_l_max        26 
_diffrn_reflns_theta_min          1.68 
_diffrn_reflns_theta_max          24.00 
_reflns_number_total              5606 
_reflns_number_gt                 4035 
_reflns_threshold_expression      >2sigma(I) 
 
_computing_data_collection        'Bruker APEX' 
_computing_cell_refinement        'Bruker APEX' 
_computing_data_reduction         'Bruker APEX' 
_computing_structure_solution     'SHELXS-97 (Sheldrick, 1990)' 
_computing_structure_refinement   'SHELXL-97 (Sheldrick, 1997)' 
_computing_molecular_graphics     'Bruker SHELXTL' 
_computing_publication_material   'Bruker SHELXTL'
 
_refine_special_details 
; 
 Refinement of F^2^ against ALL reflections.  The weighted R-factor wR and 
 goodness of fit S are based on F^2^, conventional R-factors R are based 
 on F, with F set to zero for negative F^2^. The threshold expression of 
 F^2^ > 2sigma(F^2^) is used only for calculating R-factors(gt) etc. and is 
 not relevant to the choice of reflections for refinement.  R-factors based 
 on F^2^ are statistically about twice as large as those based on F, and R- 
 factors based on ALL data will be even larger. 
; 
 
_refine_ls_structure_factor_coef  Fsqd  
_refine_ls_matrix_type            full 
_refine_ls_weighting_scheme       calc  
_refine_ls_weighting_details 
 'calc w=1/[\s^2^(Fo^2^)+(0.1000P)^2^+1.3000P] where P=(Fo^2^+2Fc^2^)/3' 
_atom_sites_solution_primary      direct 
_atom_sites_solution_secondary    difmap 
_atom_sites_solution_hydrogens    geom 
_refine_ls_hydrogen_treatment     mixed 
_refine_ls_extinction_method      none 
_refine_ls_extinction_coef        ? 
_refine_ls_number_reflns          5606 
_refine_ls_number_parameters      434 
_refine_ls_number_restraints      0 
_refine_ls_R_factor_all           0.0686 
_refine_ls_R_factor_gt            0.0478 
_refine_ls_wR_factor_ref          0.1608 
_refine_ls_wR_factor_gt           0.1386 
_refine_ls_goodness_of_fit_ref    1.007 
_refine_ls_restrained_S_all       1.007 
_refine_ls_shift/su_max           0.001 
_refine_ls_shift/su_mean          0.000 
 
loop_ 
 _atom_site_label 
 _atom_site_type_symbol 
 _atom_site_fract_x 
 _atom_site_fract_y 
 _atom_site_fract_z 
 _atom_site_U_iso_or_equiv 
 _atom_site_adp_type 
 _atom_site_occupancy 
 _atom_site_symmetry_multiplicity 
 _atom_site_calc_flag 
 _atom_site_refinement_flags 
 _atom_site_disorder_assembly 
 _atom_site_disorder_group 
P1 P -0.23825(3) 0.94033(5) 0.05405(3) 0.0308(2) Uani 1 1 d . . . 
O1 O 0.05160(9) 0.73916(12) 0.19464(9) 0.0340(5) Uani 1 1 d . . . 
H1A H 0.0452 0.7650 0.2244 0.051 Uiso 1 1 calc R . . 
C7 C -0.27919(12) 0.94051(19) -0.03066(13) 0.0315(7) Uani 1 1 d . . . 
C10 C -0.33967(15) 0.9410(2) -0.16105(14) 0.0439(8) Uani 1 1 d . . . 
H10A H -0.3606 0.9413 -0.2059 0.053 Uiso 1 1 calc R . . 
C1 C -0.16301(12) 0.88623(18) 0.07616(13) 0.0308(6) Uani 1 1 d . . . 
C13 C -0.28734(12) 0.8824(2) 0.08770(13) 0.0331(7) Uani 1 1 d . . . 
C19 C -0.22498(12) 1.05583(19) 0.07828(13) 0.0330(7) Uani 1 1 d . . . 
C3 C -0.07294(13) 0.84415(18) 0.05185(13) 0.0326(7) Uani 1 1 d . . . 
H3A H -0.0552 0.8337 0.0209 0.039 Uiso 1 1 calc R . . 
C29 C 0.05037(12) 0.6276(2) 0.01418(13) 0.0377(7) Uani 1 1 d . . . 
H29A H 0.0442 0.5649 0.0074 0.045 Uiso 1 1 calc R . . 
C5 C -0.06540(12) 0.83954(19) 0.15820(13) 0.0333(7) Uani 1 1 d . . . 
H5A H -0.0423 0.8255 0.2016 0.040 Uiso 1 1 calc R . . 
C25 C 0.05338(12) 0.75807(19) 0.08033(13) 0.0318(7) Uani 1 1 d . . . 
C34 C 0.09214(13) 0.88764(19) 0.17507(13) 0.0339(7) Uani 1 1 d . . . 
C6 C -0.12760(13) 0.86782(19) 0.14007(13) 0.0339(7) Uani 1 1 d . . . 
H6A H -0.1462 0.8748 0.1707 0.041 Uiso 1 1 calc R . . 
C35 C 0.07903(14) 0.9789(2) 0.18179(14) 0.0397(7) Uani 1 1 d . . . 
C26 C 0.06754(12) 0.8091(2) 0.03502(13) 0.0358(7) Uani 1 1 d . . . 
C30 C 0.04404(12) 0.66501(19) 0.06731(13) 0.0337(7) Uani 1 1 d . . . 
C12 C -0.33069(13) 0.8838(2) -0.05997(14) 0.0369(7) Uani 1 1 d . . . 
H12A H -0.3452 0.8447 -0.0354 0.044 Uiso 1 1 calc R . . 
C2 C -0.13565(12) 0.87223(18) 0.03176(13) 0.0319(7) Uani 1 1 d . . . 
H2A H -0.1598 0.8819 -0.0120 0.038 Uiso 1 1 calc R . . 
C20 C -0.27443(14) 1.1177(2) 0.05386(14) 0.0389(7) Uani 1 1 d . . . 
H20A H -0.3152 1.0988 0.0253 0.047 Uiso 1 1 calc R . . 
C4 C -0.03462(12) 0.83056(18) 0.11548(12) 0.0295(6) Uani 1 1 d . . . 
C39 C 0.15763(13) 0.8631(2) 0.20358(13) 0.0362(7) Uani 1 1 d . . . 
C14 C -0.27725(13) 0.7922(2) 0.10232(13) 0.0373(7) Uani 1 1 d . . . 
H14A H -0.2417 0.7628 0.0986 0.045 Uiso 1 1 calc R . . 
C27 C 0.07274(13) 0.7689(2) -0.01797(14) 0.0408(8) Uani 1 1 d . . . 
H27A H 0.0818 0.8057 -0.0475 0.049 Uiso 1 1 calc R . . 
C18 C -0.33933(14) 0.9261(2) 0.09402(15) 0.0439(8) Uani 1 1 d . . . 
H18A H -0.3461 0.9883 0.0851 0.053 Uiso 1 1 calc R . . 
C11 C -0.36080(14) 0.8850(2) -0.12579(14) 0.0414(8) Uani 1 1 d . . . 
H11A H -0.3962 0.8467 -0.1462 0.050 Uiso 1 1 calc R . . 
C8 C -0.25812(13) 0.9971(2) -0.06692(14) 0.0375(7) Uani 1 1 d . . . 
H8A H -0.2230 1.0360 -0.0469 0.045 Uiso 1 1 calc R . . 
C24 C -0.16519(13) 1.0847(2) 0.12011(14) 0.0379(7) Uani 1 1 d . . . 
H24A H -0.1313 1.0429 0.1368 0.046 Uiso 1 1 calc R . . 
C15 C -0.31848(15) 0.7443(2) 0.12226(14) 0.0447(8) Uani 1 1 d . . . 
H15A H -0.3112 0.6825 0.1324 0.054 Uiso 1 1 calc R . . 
C38 C 0.20428(14) 0.9260(2) 0.23486(14) 0.0449(8) Uani 1 1 d . . . 
H38A H 0.2473 0.9066 0.2537 0.054 Uiso 1 1 calc R . . 
C9 C -0.28850(14) 0.9969(2) -0.13241(14) 0.0434(8) Uani 1 1 d . . . 
H9A H -0.2740 1.0352 -0.1574 0.052 Uiso 1 1 calc R . . 
C28 C 0.06527(13) 0.6781(2) -0.02936(13) 0.0400(7) Uani 1 1 d . . . 
B1 B 0.04142(15) 0.8049(2) 0.14123(15) 0.0320(7) Uani 1 1 d . . . 
C31 C 0.07689(15) 0.9101(2) 0.04026(15) 0.0475(8) Uani 1 1 d . . . 
H31A H 0.0863 0.9320 0.0042 0.071 Uiso 1 1 calc R . . 
H31B H 0.1125 0.9246 0.0799 0.071 Uiso 1 1 calc R . . 
H31C H 0.0380 0.9388 0.0400 0.071 Uiso 1 1 calc R . . 
C23 C -0.15540(15) 1.1740(2) 0.13716(15) 0.0442(8) Uani 1 1 d . . . 
H23A H -0.1147 1.1934 0.1657 0.053 Uiso 1 1 calc R . . 
C17 C -0.38043(15) 0.8777(2) 0.11331(17) 0.0555(9) Uani 1 1 d . . . 
H17A H -0.4161 0.9066 0.1171 0.067 Uiso 1 1 calc R . . 
C36 C 0.12741(16) 1.0397(2) 0.21285(15) 0.0470(8) Uani 1 1 d . . . 
H36A H 0.1165 1.1006 0.2158 0.056 Uiso 1 1 calc R . . 
C32 C 0.07054(16) 0.6354(2) -0.08675(15) 0.0529(9) Uani 1 1 d . . . 
H32A H 0.0812 0.6812 -0.1119 0.079 Uiso 1 1 calc R . . 
H32B H 0.0298 0.6074 -0.1125 0.079 Uiso 1 1 calc R . . 
H32C H 0.1040 0.5896 -0.0733 0.079 Uiso 1 1 calc R . . 
C22 C -0.20400(15) 1.2349(2) 0.11326(16) 0.0467(8) Uani 1 1 d . . . 
H22A H -0.1968 1.2962 0.1253 0.056 Uiso 1 1 calc R . . 
C21 C -0.26348(15) 1.2073(2) 0.07172(15) 0.0454(8) Uani 1 1 d . . . 
H21A H -0.2970 1.2498 0.0553 0.054 Uiso 1 1 calc R . . 
C42 C 0.18124(14) 0.7693(2) 0.20212(16) 0.0485(8) Uani 1 1 d . . . 
H42A H 0.2276 0.7677 0.2245 0.073 Uiso 1 1 calc R . . 
H42B H 0.1701 0.7506 0.1580 0.073 Uiso 1 1 calc R . . 
H42C H 0.1614 0.7285 0.2229 0.073 Uiso 1 1 calc R . . 
C16 C -0.37012(15) 0.7870(2) 0.12724(15) 0.0515(9) Uani 1 1 d . . . 
H16A H -0.3989 0.7543 0.1403 0.062 Uiso 1 1 calc R . . 
C37 C 0.19119(16) 1.0148(2) 0.23973(14) 0.0465(8) Uani 1 1 d . . . 
C33 C 0.02533(16) 0.6010(2) 0.10847(15) 0.0489(8) Uani 1 1 d . . . 
H33A H 0.0216 0.5402 0.0910 0.073 Uiso 1 1 calc R . . 
H33B H -0.0157 0.6194 0.1096 0.073 Uiso 1 1 calc R . . 
H33C H 0.0579 0.6016 0.1516 0.073 Uiso 1 1 calc R . . 
C41 C 0.24284(17) 1.0820(3) 0.27052(17) 0.0668(11) Uani 1 1 d . . . 
H41A H 0.2842 1.0516 0.2864 0.100 Uiso 1 1 calc R . . 
H41B H 0.2357 1.1108 0.3059 0.100 Uiso 1 1 calc R . . 
H41C H 0.2424 1.1276 0.2394 0.100 Uiso 1 1 calc R . . 
C40 C 0.01316(16) 1.0199(2) 0.15548(18) 0.0556(9) Uani 1 1 d . . . 
H40A H 0.0160 1.0839 0.1660 0.083 Uiso 1 1 calc R . . 
H40B H -0.0140 0.9898 0.1741 0.083 Uiso 1 1 calc R . . 
H40C H -0.0052 1.0126 0.1093 0.083 Uiso 1 1 calc R . . 
C43 C 0.0000 0.5787(3) -0.2500 0.0566(13) Uani 1 2 d S . . 
Cl1 Cl -0.06286(5) 0.64319(7) -0.24646(4) 0.0701(3) Uani 1 1 d . . . 
H1 H -0.0204(18) 0.548(3) -0.2915(17) 0.085(13) Uiso 1 1 d . . . 
O2 O 0.0000 0.6168(2) 0.2500 0.0423(8) Uani 1 2 d S . . 
H2 H 0.0155(14) 0.6506(19) 0.2308(14) 0.038(9) Uiso 1 1 d . . . 
 
loop_ 
 _atom_site_aniso_label 
 _atom_site_aniso_U_11 
 _atom_site_aniso_U_22 
 _atom_site_aniso_U_33 
 _atom_site_aniso_U_23 
 _atom_site_aniso_U_13 
 _atom_site_aniso_U_12 
P1 0.0214(4) 0.0444(5) 0.0269(4) 0.0027(3) 0.0096(3) 0.0061(3) 
O1 0.0346(11) 0.0398(11) 0.0302(11) -0.0005(8) 0.0152(9) 0.0058(9) 
C7 0.0215(14) 0.0443(17) 0.0290(15) 0.0029(13) 0.0101(12) 0.0091(12) 
C10 0.0403(18) 0.060(2) 0.0267(16) 0.0008(15) 0.0072(14) 0.0175(16) 
C1 0.0221(14) 0.0400(17) 0.0294(15) 0.0010(12) 0.0088(12) 0.0042(12) 
C13 0.0239(14) 0.0488(19) 0.0262(15) 0.0033(13) 0.0092(12) 0.0039(13) 
C19 0.0276(15) 0.0450(18) 0.0291(15) 0.0034(13) 0.0139(13) 0.0065(13) 
C3 0.0291(15) 0.0429(17) 0.0290(15) -0.0020(13) 0.0149(13) 0.0029(13) 
C29 0.0252(15) 0.0482(18) 0.0358(17) -0.0066(14) 0.0071(13) 0.0058(13) 
C5 0.0284(15) 0.0461(18) 0.0239(15) 0.0019(12) 0.0082(12) 0.0083(13) 
C25 0.0188(14) 0.0436(18) 0.0305(15) 0.0005(13) 0.0065(12) 0.0060(12) 
C34 0.0319(16) 0.0423(18) 0.0288(16) 0.0024(13) 0.0130(13) 0.0033(13) 
C6 0.0279(15) 0.0504(18) 0.0271(15) 0.0018(13) 0.0145(13) 0.0079(13) 
C35 0.0423(18) 0.0417(18) 0.0344(17) -0.0026(14) 0.0138(14) -0.0013(14) 
C26 0.0232(15) 0.0487(18) 0.0330(16) 0.0040(14) 0.0080(12) 0.0040(13) 
C30 0.0269(15) 0.0431(18) 0.0314(16) -0.0024(13) 0.0114(13) 0.0046(13) 
C12 0.0273(15) 0.0460(18) 0.0368(17) 0.0022(14) 0.0113(13) 0.0080(13) 
C2 0.0260(15) 0.0428(17) 0.0247(15) -0.0009(12) 0.0073(12) 0.0036(12) 
C20 0.0306(16) 0.050(2) 0.0368(17) 0.0047(14) 0.0133(14) 0.0078(14) 
C4 0.0264(14) 0.0344(16) 0.0274(15) -0.0024(12) 0.0098(12) 0.0038(12) 
C39 0.0308(16) 0.0501(19) 0.0310(16) -0.0014(13) 0.0154(13) -0.0007(13) 
C14 0.0319(16) 0.0486(19) 0.0327(16) 0.0001(14) 0.0138(13) 0.0049(14) 
C27 0.0278(16) 0.065(2) 0.0302(16) 0.0038(15) 0.0117(13) 0.0035(14) 
C18 0.0342(17) 0.056(2) 0.0466(19) 0.0128(16) 0.0208(15) 0.0106(15) 
C11 0.0308(16) 0.053(2) 0.0330(17) -0.0015(15) 0.0042(14) 0.0083(14) 
C8 0.0287(15) 0.0493(19) 0.0359(17) 0.0036(14) 0.0137(13) 0.0062(13) 
C24 0.0281(15) 0.0488(19) 0.0373(17) -0.0001(14) 0.0128(13) 0.0053(14) 
C15 0.0471(19) 0.052(2) 0.0379(18) 0.0039(15) 0.0197(16) -0.0007(15) 
C38 0.0317(16) 0.075(3) 0.0307(17) -0.0018(16) 0.0143(14) -0.0068(16) 
C9 0.0436(19) 0.057(2) 0.0342(18) 0.0085(15) 0.0204(15) 0.0122(16) 
C28 0.0242(15) 0.065(2) 0.0294(16) -0.0043(15) 0.0085(13) 0.0050(14) 
B1 0.0272(17) 0.0371(18) 0.0318(18) 0.0012(15) 0.0116(14) 0.0063(14) 
C31 0.051(2) 0.055(2) 0.0378(18) 0.0078(15) 0.0188(16) 0.0019(16) 
C23 0.0354(17) 0.050(2) 0.0462(19) -0.0076(16) 0.0140(15) -0.0008(15) 
C17 0.0387(19) 0.073(3) 0.066(2) 0.0156(19) 0.0327(18) 0.0135(17) 
C36 0.061(2) 0.0441(19) 0.0394(18) -0.0030(15) 0.0225(17) -0.0064(17) 
C32 0.0463(19) 0.076(2) 0.0382(19) -0.0115(17) 0.0180(16) -0.0007(17) 
C22 0.046(2) 0.0444(19) 0.057(2) -0.0002(16) 0.0271(17) 0.0013(15) 
C21 0.0412(19) 0.048(2) 0.049(2) 0.0071(16) 0.0196(16) 0.0120(15) 
C42 0.0280(16) 0.069(2) 0.0458(19) -0.0072(16) 0.0114(15) 0.0103(15) 
C16 0.044(2) 0.068(2) 0.051(2) 0.0118(18) 0.0272(17) -0.0019(17) 
C37 0.055(2) 0.057(2) 0.0318(17) -0.0068(15) 0.0207(16) -0.0177(17) 
C33 0.068(2) 0.0381(18) 0.050(2) -0.0113(15) 0.0330(18) -0.0059(16) 
C41 0.072(3) 0.083(3) 0.051(2) -0.011(2) 0.029(2) -0.039(2) 
C40 0.053(2) 0.0419(19) 0.066(2) -0.0022(17) 0.0170(18) 0.0093(16) 
C43 0.079(4) 0.045(3) 0.046(3) 0.000 0.024(3) 0.000 
Cl1 0.0659(6) 0.0968(8) 0.0467(6) 0.0053(5) 0.0202(5) 0.0152(5) 
O2 0.048(2) 0.042(2) 0.0365(18) 0.000 0.0149(16) 0.000 
 
_geom_special_details 
; 
 All esds (except the esd in the dihedral angle between two l.s. planes) 
 are estimated using the full covariance matrix.  The cell esds are taken 
 into account individually in the estimation of esds in distances, angles 
 and torsion angles; correlations between esds in cell parameters are only 
 used when they are defined by crystal symmetry.  An approximate (isotropic) 
 treatment of cell esds is used for estimating esds involving l.s. planes. 
; 
 
loop_ 
 _geom_bond_atom_site_label_1 
 _geom_bond_atom_site_label_2 
 _geom_bond_distance 
 _geom_bond_site_symmetry_2 
 _geom_bond_publ_flag 
P1 C1 1.780(3) . ? 
P1 C7 1.797(3) . ? 
P1 C13 1.797(3) . ? 
P1 C19 1.798(3) . ? 
O1 B1 1.511(4) . ? 
O1 H1A 0.8400 . ? 
C7 C8 1.388(4) . ? 
C7 C12 1.391(4) . ? 
C10 C11 1.366(4) . ? 
C10 C9 1.376(4) . ? 
C10 H10A 0.9500 . ? 
C1 C2 1.390(4) . ? 
C1 C6 1.398(4) . ? 
C13 C14 1.383(4) . ? 
C13 C18 1.403(4) . ? 
C19 C20 1.395(4) . ? 
C19 C24 1.397(4) . ? 
C3 C2 1.384(4) . ? 
C3 C4 1.394(4) . ? 
C3 H3A 0.9500 . ? 
C29 C28 1.387(4) . ? 
C29 C30 1.390(4) . ? 
C29 H29A 0.9500 . ? 
C5 C6 1.378(4) . ? 
C5 C4 1.405(4) . ? 
C5 H5A 0.9500 . ? 
C25 C26 1.415(4) . ? 
C25 C30 1.418(4) . ? 
C25 B1 1.667(4) . ? 
C34 C35 1.414(4) . ? 
C34 C39 1.426(4) . ? 
C34 B1 1.663(4) . ? 
C6 H6A 0.9500 . ? 
C35 C36 1.392(4) . ? 
C35 C40 1.512(4) . ? 
C26 C27 1.393(4) . ? 
C26 C31 1.519(4) . ? 
C30 C33 1.509(4) . ? 
C12 C11 1.393(4) . ? 
C12 H12A 0.9500 . ? 
C2 H2A 0.9500 . ? 
C20 C21 1.391(4) . ? 
C20 H20A 0.9500 . ? 
C4 B1 1.643(4) . ? 
C39 C38 1.392(4) . ? 
C39 C42 1.501(4) . ? 
C14 C15 1.384(4) . ? 
C14 H14A 0.9500 . ? 
C27 C28 1.376(4) . ? 
C27 H27A 0.9500 . ? 
C18 C17 1.377(4) . ? 
C18 H18A 0.9500 . ? 
C11 H11A 0.9500 . ? 
C8 C9 1.386(4) . ? 
C8 H8A 0.9500 . ? 
C24 C23 1.381(4) . ? 
C24 H24A 0.9500 . ? 
C15 C16 1.376(4) . ? 
C15 H15A 0.9500 . ? 
C38 C37 1.369(5) . ? 
C38 H38A 0.9500 . ? 
C9 H9A 0.9500 . ? 
C28 C32 1.501(4) . ? 
C31 H31A 0.9800 . ? 
C31 H31B 0.9800 . ? 
C31 H31C 0.9800 . ? 
C23 C22 1.371(4) . ? 
C23 H23A 0.9500 . ? 
C17 C16 1.388(5) . ? 
C17 H17A 0.9500 . ? 
C36 C37 1.391(5) . ? 
C36 H36A 0.9500 . ? 
C32 H32A 0.9800 . ? 
C32 H32B 0.9800 . ? 
C32 H32C 0.9800 . ? 
C22 C21 1.384(4) . ? 
C22 H22A 0.9500 . ? 
C21 H21A 0.9500 . ? 
C42 H42A 0.9800 . ? 
C42 H42B 0.9800 . ? 
C42 H42C 0.9800 . ? 
C16 H16A 0.9500 . ? 
C37 C41 1.499(4) . ? 
C33 H33A 0.9800 . ? 
C33 H33B 0.9800 . ? 
C33 H33C 0.9800 . ? 
C41 H41A 0.9800 . ? 
C41 H41B 0.9800 . ? 
C41 H41C 0.9800 . ? 
C40 H40A 0.9800 . ? 
C40 H40B 0.9800 . ? 
C40 H40C 0.9800 . ? 
C43 Cl1 1.748(3) . ? 
C43 Cl1 1.748(3) 2_554 ? 
C43 H1 0.99(4) . ? 
O2 H2 0.83(3) . ? 
 
loop_ 
 _geom_angle_atom_site_label_1 
 _geom_angle_atom_site_label_2 
 _geom_angle_atom_site_label_3 
 _geom_angle 
 _geom_angle_site_symmetry_1 
 _geom_angle_site_symmetry_3 
 _geom_angle_publ_flag 
C1 P1 C7 110.69(12) . . ? 
C1 P1 C13 110.21(13) . . ? 
C7 P1 C13 107.98(13) . . ? 
C1 P1 C19 108.45(13) . . ? 
C7 P1 C19 106.64(13) . . ? 
C13 P1 C19 112.82(13) . . ? 
B1 O1 H1A 109.5 . . ? 
C8 C7 C12 120.1(3) . . ? 
C8 C7 P1 119.1(2) . . ? 
C12 C7 P1 120.8(2) . . ? 
C11 C10 C9 120.8(3) . . ? 
C11 C10 H10A 119.6 . . ? 
C9 C10 H10A 119.6 . . ? 
C2 C1 C6 119.4(2) . . ? 
C2 C1 P1 120.6(2) . . ? 
C6 C1 P1 119.6(2) . . ? 
C14 C13 C18 119.7(3) . . ? 
C14 C13 P1 119.8(2) . . ? 
C18 C13 P1 120.2(2) . . ? 
C20 C19 C24 119.6(3) . . ? 
C20 C19 P1 119.7(2) . . ? 
C24 C19 P1 120.7(2) . . ? 
C2 C3 C4 123.0(2) . . ? 
C2 C3 H3A 118.5 . . ? 
C4 C3 H3A 118.5 . . ? 
C28 C29 C30 122.7(3) . . ? 
C28 C29 H29A 118.6 . . ? 
C30 C29 H29A 118.6 . . ? 
C6 C5 C4 123.0(3) . . ? 
C6 C5 H5A 118.5 . . ? 
C4 C5 H5A 118.5 . . ? 
C26 C25 C30 115.5(2) . . ? 
C26 C25 B1 122.5(3) . . ? 
C30 C25 B1 121.7(2) . . ? 
C35 C34 C39 115.1(3) . . ? 
C35 C34 B1 128.8(2) . . ? 
C39 C34 B1 116.0(2) . . ? 
C5 C6 C1 119.3(2) . . ? 
C5 C6 H6A 120.3 . . ? 
C1 C6 H6A 120.3 . . ? 
C36 C35 C34 121.6(3) . . ? 
C36 C35 C40 114.1(3) . . ? 
C34 C35 C40 124.3(3) . . ? 
C27 C26 C25 121.3(3) . . ? 
C27 C26 C31 116.0(3) . . ? 
C25 C26 C31 122.6(3) . . ? 
C29 C30 C25 121.2(3) . . ? 
C29 C30 C33 115.8(3) . . ? 
C25 C30 C33 123.0(2) . . ? 
C7 C12 C11 119.2(3) . . ? 
C7 C12 H12A 120.4 . . ? 
C11 C12 H12A 120.4 . . ? 
C3 C2 C1 119.5(2) . . ? 
C3 C2 H2A 120.2 . . ? 
C1 C2 H2A 120.2 . . ? 
C21 C20 C19 119.4(3) . . ? 
C21 C20 H20A 120.3 . . ? 
C19 C20 H20A 120.3 . . ? 
C3 C4 C5 115.5(2) . . ? 
C3 C4 B1 124.1(2) . . ? 
C5 C4 B1 120.4(2) . . ? 
C38 C39 C34 121.2(3) . . ? 
C38 C39 C42 115.5(3) . . ? 
C34 C39 C42 123.2(3) . . ? 
C13 C14 C15 120.6(3) . . ? 
C13 C14 H14A 119.7 . . ? 
C15 C14 H14A 119.7 . . ? 
C28 C27 C26 122.8(3) . . ? 
C28 C27 H27A 118.6 . . ? 
C26 C27 H27A 118.6 . . ? 
C17 C18 C13 119.2(3) . . ? 
C17 C18 H18A 120.4 . . ? 
C13 C18 H18A 120.4 . . ? 
C10 C11 C12 120.3(3) . . ? 
C10 C11 H11A 119.9 . . ? 
C12 C11 H11A 119.9 . . ? 
C9 C8 C7 119.8(3) . . ? 
C9 C8 H8A 120.1 . . ? 
C7 C8 H8A 120.1 . . ? 
C23 C24 C19 120.0(3) . . ? 
C23 C24 H24A 120.0 . . ? 
C19 C24 H24A 120.0 . . ? 
C16 C15 C14 119.5(3) . . ? 
C16 C15 H15A 120.2 . . ? 
C14 C15 H15A 120.2 . . ? 
C37 C38 C39 123.2(3) . . ? 
C37 C38 H38A 118.4 . . ? 
C39 C38 H38A 118.4 . . ? 
C10 C9 C8 119.8(3) . . ? 
C10 C9 H9A 120.1 . . ? 
C8 C9 H9A 120.1 . . ? 
C27 C28 C29 116.4(3) . . ? 
C27 C28 C32 122.5(3) . . ? 
C29 C28 C32 121.0(3) . . ? 
O1 B1 C4 104.9(2) . . ? 
O1 B1 C34 103.9(2) . . ? 
C4 B1 C34 116.2(2) . . ? 
O1 B1 C25 112.1(2) . . ? 
C4 B1 C25 106.4(2) . . ? 
C34 B1 C25 113.2(2) . . ? 
C26 C31 H31A 109.5 . . ? 
C26 C31 H31B 109.5 . . ? 
H31A C31 H31B 109.5 . . ? 
C26 C31 H31C 109.5 . . ? 
H31A C31 H31C 109.5 . . ? 
H31B C31 H31C 109.5 . . ? 
C22 C23 C24 120.5(3) . . ? 
C22 C23 H23A 119.8 . . ? 
C24 C23 H23A 119.8 . . ? 
C18 C17 C16 120.5(3) . . ? 
C18 C17 H17A 119.8 . . ? 
C16 C17 H17A 119.8 . . ? 
C37 C36 C35 122.5(3) . . ? 
C37 C36 H36A 118.8 . . ? 
C35 C36 H36A 118.8 . . ? 
C28 C32 H32A 109.5 . . ? 
C28 C32 H32B 109.5 . . ? 
H32A C32 H32B 109.5 . . ? 
C28 C32 H32C 109.5 . . ? 
H32A C32 H32C 109.5 . . ? 
H32B C32 H32C 109.5 . . ? 
C23 C22 C21 120.2(3) . . ? 
C23 C22 H22A 119.9 . . ? 
C21 C22 H22A 119.9 . . ? 
C22 C21 C20 120.3(3) . . ? 
C22 C21 H21A 119.8 . . ? 
C20 C21 H21A 119.8 . . ? 
C39 C42 H42A 109.5 . . ? 
C39 C42 H42B 109.5 . . ? 
H42A C42 H42B 109.5 . . ? 
C39 C42 H42C 109.5 . . ? 
H42A C42 H42C 109.5 . . ? 
H42B C42 H42C 109.5 . . ? 
C15 C16 C17 120.4(3) . . ? 
C15 C16 H16A 119.8 . . ? 
C17 C16 H16A 119.8 . . ? 
C38 C37 C36 116.4(3) . . ? 
C38 C37 C41 121.9(3) . . ? 
C36 C37 C41 121.6(3) . . ? 
C30 C33 H33A 109.5 . . ? 
C30 C33 H33B 109.5 . . ? 
H33A C33 H33B 109.5 . . ? 
C30 C33 H33C 109.5 . . ? 
H33A C33 H33C 109.5 . . ? 
H33B C33 H33C 109.5 . . ? 
C37 C41 H41A 109.5 . . ? 
C37 C41 H41B 109.5 . . ? 
H41A C41 H41B 109.5 . . ? 
C37 C41 H41C 109.5 . . ? 
H41A C41 H41C 109.5 . . ? 
H41B C41 H41C 109.5 . . ? 
C35 C40 H40A 109.5 . . ? 
C35 C40 H40B 109.5 . . ? 
H40A C40 H40B 109.5 . . ? 
C35 C40 H40C 109.5 . . ? 
H40A C40 H40C 109.5 . . ? 
H40B C40 H40C 109.5 . . ? 
Cl1 C43 Cl1 113.3(3) . 2_554 ? 
Cl1 C43 H1 102(2) . . ? 
Cl1 C43 H1 108(2) 2_554 . ? 
 
_diffrn_measured_fraction_theta_max    1.000 
_diffrn_reflns_theta_full              24.00 
_diffrn_measured_fraction_theta_full   1.000 
_refine_diff_density_max    0.604 
_refine_diff_density_min   -0.499 
_refine_diff_density_rms    0.076 
